# Supplementary material for: First Case of COVID-19 Infection with Fulminant Myocarditis Complication: Case Report and Insights
Source: Preprints.org preprint supplement (doi:10.20944/preprints202003.0180.v1), 2020-03-11
Supplement: Supplementary file 1 [file supplementary]

## CARE Checklist (2013) of information to include when writing a case report

| Topic                           | Item       | Checklist item description                                                                           | Reported on page    |
|---------------------------------|------------|------------------------------------------------------------------------------------------------------|---------------------|
| <b>Title</b>                    | <b>1</b>   | The words “case report” should be in the title along with what is of greatest interest in this case  | 1                   |
| <b>Key Words</b>                | <b>2</b>   | The key elements of this case in 2 to 5 key words                                                    | 4                   |
| <b>Abstract</b>                 | <b>3a</b>  | Introduction—What is unique about this case? What does it add to the medical literature?             | 4                   |
|                                 | <b>3b</b>  | The main symptoms of the patient and the important clinical findings                                 | 4                   |
|                                 | <b>3c</b>  | The main diagnoses, therapeutics interventions, and outcomes                                         | 4                   |
|                                 | <b>3d</b>  | Conclusion—What are the main “take-away” lessons from this case?                                     | 4                   |
| <b>Introduction</b>             | <b>4</b>   | Brief background summary of this case referencing the relevant medical literature                    | 5                   |
| <b>Patient Information</b>      | <b>5a</b>  | Demographic information (such as age, gender, ethnicity, occupation)                                 | 5                   |
|                                 | <b>5b</b>  | Main symptoms of the patient (his or her chief complaints)                                           | 5~6                 |
|                                 | <b>5c</b>  | Medical, family, and psychosocial history including co-morbidities, and relevant genetic information | /                   |
|                                 | <b>5d</b>  | Relevant past interventions and their outcomes                                                       | /                   |
| <b>Clinical Findings</b>        | <b>6</b>   | Describe the relevant physical examination (PE) findings                                             | 5~6                 |
| <b>Timeline</b>                 | <b>7</b>   | Depict important milestones related to your diagnoses and interventions (table or figure)            | Table 1, Figure 1~5 |
| <b>Diagnostic Assessment</b>    | <b>8a</b>  | Diagnostic methods (such as PE, laboratory testing, imaging, questionnaires)                         | 5~6                 |
|                                 | <b>8b</b>  | Diagnostic challenges (such as financial, language, or cultural)                                     | 5~6                 |
|                                 | <b>8c</b>  | Diagnostic reasoning including other diagnoses considered                                            | 5~6                 |
|                                 | <b>8d</b>  | Prognostic characteristics (such as staging in oncology) where applicable                            | /                   |
| <b>Therapeutic Intervention</b> | <b>9a</b>  | Types of intervention (such as pharmacologic, surgical, preventive, self-care)                       | 5~6                 |
|                                 | <b>9b</b>  | Administration of intervention (such as dosage, strength, duration)                                  | 5~6                 |
|                                 | <b>9c</b>  | Changes in intervention (with rationale)                                                             | /                   |
| <b>Follow-up and Outcomes</b>   | <b>10a</b> | Clinician-assessed outcomes and when appropriate patient-assessed outcomes                           | 6                   |
|                                 | <b>10b</b> | Important follow-up test results                                                                     | Table 1, Figure 1,4 |
|                                 | <b>10c</b> | Intervention adherence and tolerability (How was this assessed?)                                     | 6                   |
|                                 | <b>10d</b> | Adverse and unanticipated events                                                                     | /                   |
| <b>Discussion</b>               | <b>11a</b> | Discussion of the strengths and limitations in the management of this case                           | 6~8                 |
|                                 | <b>11b</b> | Discussion of the relevant medical literature                                                        | 6~8                 |
|                                 | <b>11c</b> | The rationale for conclusions (including assessment of possible causes)                              | 6~8                 |
|                                 | <b>11d</b> | The main “take-away” lessons of this case report                                                     | 8                   |
| <b>Patient Perspective</b>      | <b>12</b>  | Did the patient share his or her perspective or experience? (Include when appropriate)               | /                   |
| <b>Informed Consent</b>         | <b>13</b>  | Did the patient give informed consent? Please provide if requested                                   | Yes                 |
